# Supplementary material
Source: PubMed Central journal article supplement (PMC2688997)
Supplement: 0809818106_0809818106SI.pdf [file 0809818106_0809818106SI.pdf]

# Supporting Information

Mueller and Ahmed 10.1073/pnas.0809818106

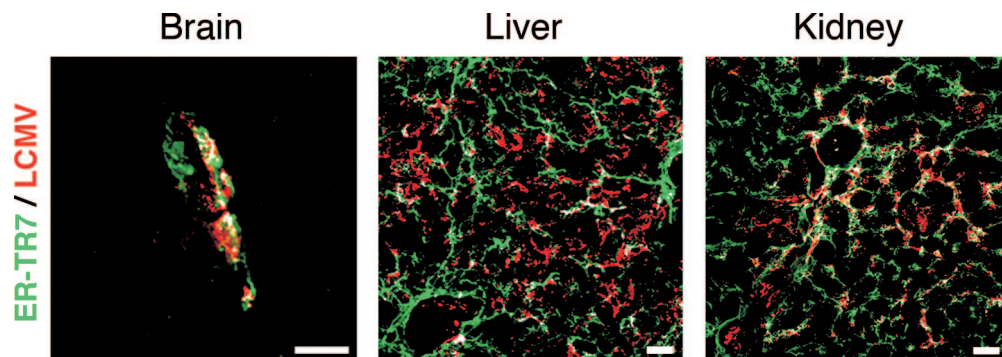

**Fig. S1.** Colocalization of LCMV antigen with ER-TR7<sup>+</sup> fibroblast cells in the brain, liver, and kidney 8 days after LCMV CL-13 infection of B6 mice. (Scale bars, 20  $\mu\text{m}$ .)



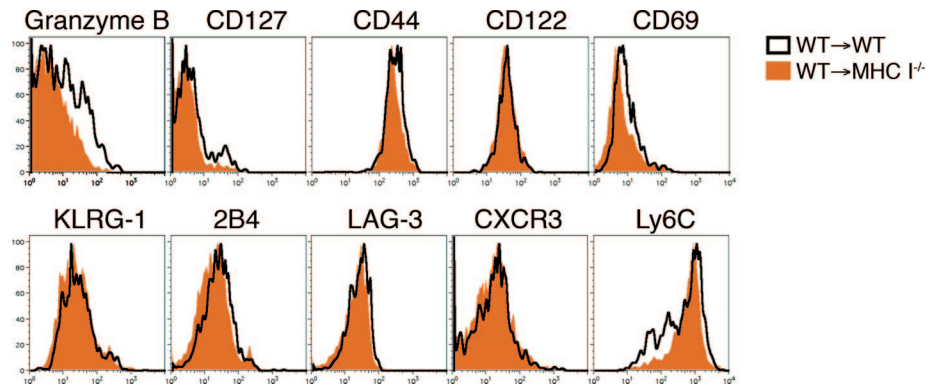

**Fig. S3.** Phenotypic analysis of responding D<sup>b</sup>GP33-specific CD8<sup>+</sup> T cells in the spleen 15 days after infection. WT→WT mice (open histograms) and WT→MHC I<sup>-/-</sup> mice (filled histograms). Data are representative of 2–3 independent experiments.

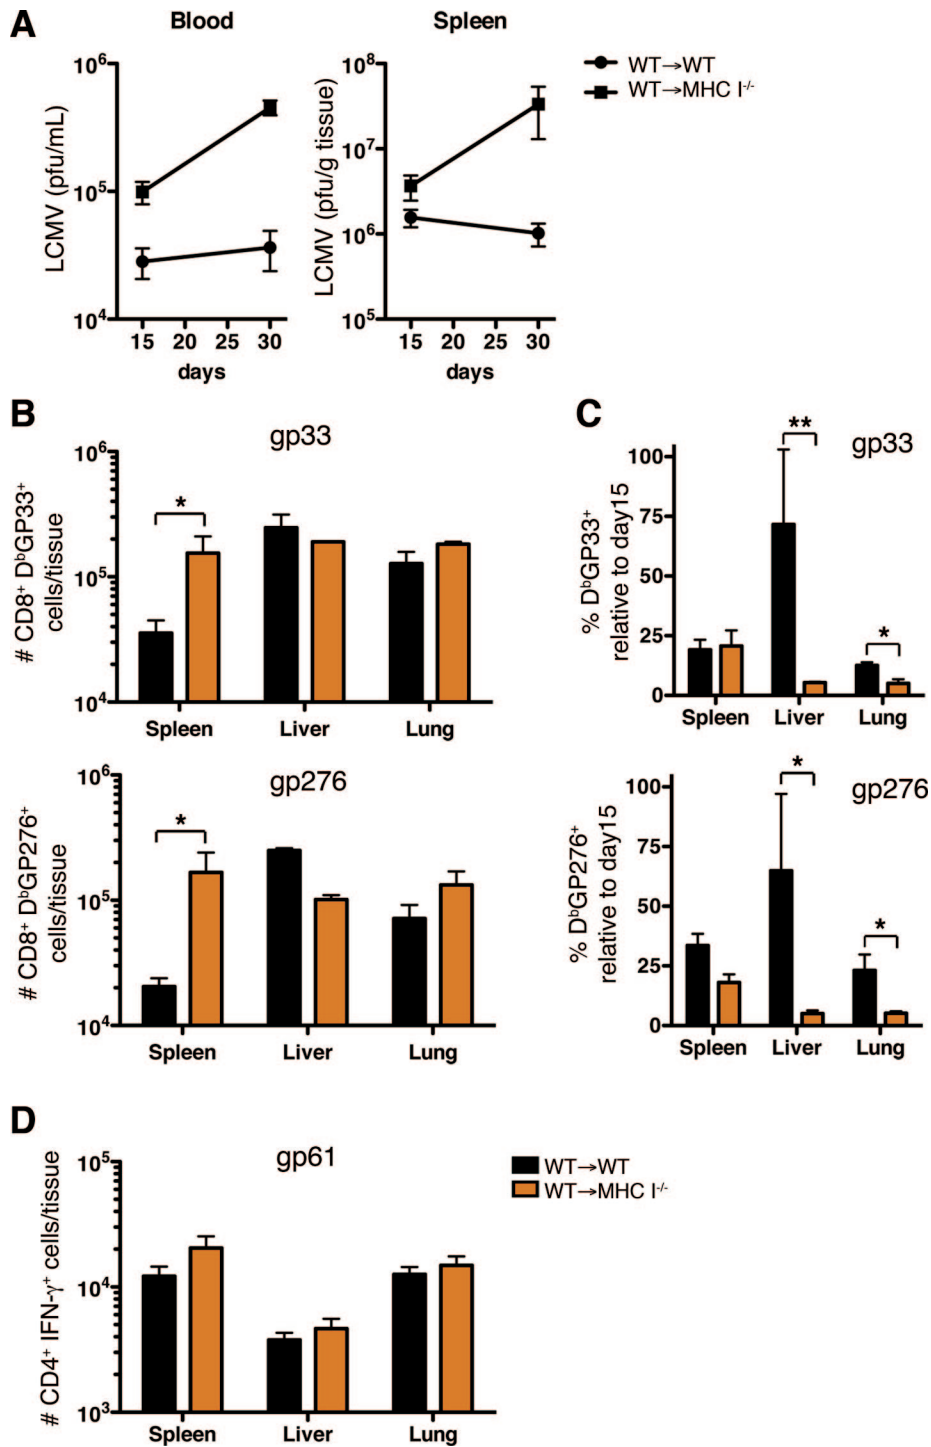

**Fig. S4.** (A) Viral titers in the serum and spleen after LCMV CL-13 infection. (B) T cell responses in the tissues 6 weeks after infection. Total number of D<sup>b</sup>GP33- or D<sup>b</sup>GP276-specific CD8<sup>+</sup> T cells in the spleen, liver, and lungs 41 days after CL-13 infection. (C) The frequency of D<sup>b</sup>GP33- or D<sup>b</sup>GP276-specific CD8<sup>+</sup> T cells in the indicated tissues at day 41 after infection, relative to that at day 15. (D) The number of GP61-specific CD4<sup>+</sup> T cells producing IFN- $\gamma$  in the indicated tissues 41 days after CL-13 infection. \*,  $P < 0.05$ ; \*\*,  $P < 0.01$ ; error bars represent SEM. Data are representative of 2 independent experiments of 4–10 mice per group.
